1 Genetic analysis of cognitive preservation in the midwestern  
2 Amish reveals a novel locus on chromosome 2.

3

4 Author names and affiliations: Leighanne R Main\*<sub>a,b,c</sub>,  
5 Yeunjoo E Song<sub>b,c</sub>, Audrey Lynn<sub>b,c</sub>, Renee A Laux<sub>b</sub>, Kristy  
6 L Miskimen<sub>b</sub>, Michael D Osterman<sub>b</sub>, Michael L Cuccaro<sub>d,e</sub>,  
7 Paula K Ogrocki<sub>f,g</sub>, Alan J Lerner<sub>f,g</sub>, Jeffery M Vance<sub>d,e</sub>, M  
8 Denise Fuzzell<sub>b</sub>, Sarada L Fuzzell<sub>b</sub>, Sherri D Hochstetler<sub>b</sub>,  
9 Daniel A Dorfsman<sub>d,e</sub>, Laura J Caywood<sub>d</sub>, Michael B  
10 Prough<sub>d</sub>, Larry D Adams<sub>d</sub>, Jason E Clouse<sub>d</sub>, Sharlene D  
11 Herington<sub>d</sub>, William K Scott<sub>d,e</sub>, Margaret A Pericak-Vance  
12<sub>d,e</sub>, Jonathan L Haines\*<sub>a,b,c</sub>

13

14<sub>a</sub> Departments of Genetics and Genome Sciences, Case  
15 Western Reserve University, 10900 Euclid Ave, Cleveland,  
16 OH, USA, 44106

17<sub>b</sub> Department of Population and Quantitative Health  
18 Sciences, Case Western Reserve University School of  
19 Medicine, 10900 Euclid Ave, Cleveland, OH, USA, 44016

20<sub>c</sub> Cleveland Institute of Computational Biology, Case  
21 Western Reserve University School of Medicine, 10900  
22 Euclid Ave, Cleveland, OH, USA, 44106

23     d John P Hussman Institute for Human Genomics, University  
24     of Miami Miller School of Medicine, 1501 NW 10th Ave,  
25     Miami, FL, USA, 33136  
26     e Dr. John T Macdonald Foundation Department of Human  
27     Genetics, University of Miami Miller School of Medicine,  
28     1501 NW 10th Ave, Miami, FL, USA, 33136  
29     f Department of Neurology, University Hospitals Cleveland  
30     Medical Center, 11100 Euclid Ave, Cleveland, OH, USA,  
31     44106  
32     g Department of Neurology, Case Western Reserve  
33     University School of Medicine, 10900 Euclid Ave, Cleveland,  
34     OH, USA, 44106  
35  
36     \*Corresponding Authors: Leighanne R Main  
37     (lrm91@case.edu), and Jonathan L Haines  
38     (jlh213@case.edu)

## 39 ABSTRACT

40 INTRODUCTION: Alzheimer disease (AD) remains a  
41 debilitating condition with limited treatments and additional  
42 therapeutic targets needed. Identifying AD protective genetic  
43 loci may identify new targets and accelerate identification of  
44 therapeutic treatments. We examined a founder population  
45 to identify loci associated with cognitive preservation into  
46 advanced age.

47 METHODS: Genome-wide association and linkage analyses  
48 were performed on 946 examined and sampled Amish  
49 individuals, aged 76-95, who were either cognitively  
50 unimpaired (CU) or impaired (CI).

51 RESULTS: 12 SNPs demonstrated suggestive association  
52 ( $P \leq 5 \times 10^{-4}$ ) with cognitive preservation. Genetic linkage  
53 analyses identified >100 significant ( $\text{LOD} \geq 3.3$ ) SNPs, some  
54 which overlapped with the association results. Only one  
55 locus on chromosome 2 retained significance across multiple  
56 analyses.

57 DISCUSSION: A novel significant result for cognitive  
58 preservation on chromosome 2 includes the genes *LRRTM4*  
59 and *CTNNA2*. Additionally, the lead SNP, rs1402906,  
60 impacts the POU3F2 transcription factor binding affinity,  
61 which regulates *LRRTM4* and *CTNNA2*.

## 62 ABBREVIATIONS

- 63 AD – Alzheimer Disease
- 64 AGDB – Anabaptist Genealogical Database
- 65 CI – Cognitively impaired
- 66 CU – Cognitively unimpaired
- 67 GWAS – Genome-wide association study
- 68 HLOD – Heterogeneity logarithm of the odds
- 69 LD – Linkage disequilibrium
- 70 LOD – Logarithm of the odds
- 71 MCI – Mild cognitive impairment
- 72 MCMC – Markov chain Monte Carlo
- 73 QC – Quality control

74

## 75 1 BACKGROUND

76 Dementia, defined broadly as a decline or loss in memory  
 77 and other cognitive abilities, is an overarching term that  
 78 incorporates many underlying conditions. Alzheimer disease  
 79 (AD), the most common form of dementia (~60-80% of  
 80 cases), affects more than five million people in the U.S. and  
 81 is becoming more prevalent as the world population ages.[1]  
 82 To date there have been over 70 genetic loci associated with  
 83 *increased* risk for AD-associated dementia,[2–4] some of  
 84 which have been targets for therapeutic development.  
 85 However, no existing treatments or therapies addressing AD  
 86 and other dementias have been sufficient to significantly

87 ameliorate AD pathology or delay onset and decline.[5] An  
 88 alternative and less often used approach for generating  
 89 therapeutic targets is the identification of genetic variation  
 90 that associates with a *decreased* risk for AD-associated  
 91 dementia (e.g., protective loci). Focusing on protective loci is  
 92 a strategy demonstrating higher success rates than focusing  
 93 on loci with increased risk when translated into  
 94 therapeutics.[6]  
 95  
 96 Phenotypically, protective AD genetic loci result in  
 97 maintenance of cognitive abilities (e.g., cognitive  
 98 preservation). To identify loci promoting cognitive  
 99 preservation, we analyzed members of the Ohio and Indiana  
 100 Amish, a founder population of European ancestry. For our  
 101 analyses, we identified older individuals who were  
 102 cognitively unimpaired (CU) but at high risk for developing  
 103 AD, defined as having a first-degree relative with dementia.  
 104 Analyses included cognitively impaired (CI) individuals as  
 105 controls. The relatively uniform lifestyle of the midwestern  
 106 Amish reduces the variability of environmental influences on  
 107 many phenotypes, while their endogamous cultural norms  
 108 increase the frequency of some normally rare genomic  
 109 variants.[7,8] Both genetic association analyses and family-

110 based linkage analyses were used to identify loci associated  
111 with cognitive preservation.

## 112 2 METHODS

### 113 2.1 Data Collection and Cognitive Screening

114 The analyzed dataset consisted of Amish individuals from  
115 Ohio and Indiana who were 76-95 years old at their last  
116 exam. Individuals underwent a panel of neurocognitive  
117 assessments to evaluate their cognitive status. Assessments  
118 included the Consortium to Establish a Registry for  
119 Alzheimer's Disease (CERAD) neuropsychological  
120 assessment[9], the Modified Mini-Mental State (3MS)  
121 exam[10], the AD8 Dementia Screening Interview[11], and  
122 the Trail Making Test for Dementia Studies.[12] Cognitive  
123 data from 2,096 individuals were available for analysis.  
124 Individuals were classified as cognitively impaired (CI) based  
125 on established testing thresholds, with determinations  
126 confirmed by a clinical adjudication board. Categories  
127 defined by the adjudication board included cognitively  
128 unimpaired for age-normed benchmarks (CU), mild cognitive  
129 impairment (MCI), borderline impairment, or cognitively  
130 impaired (CI). Additional personal and medical information  
131 was assessed to provide context for other factors related to  
132 cognition scores, such as self-reported depression.

133 Individuals unable to be categorized as CI or CU were  
134 excluded from genetic analyses. All participants provided  
135 written informed consent for participation in this study.

136

## 137 2.2 Genotyping

138 Blood was collected from participants for DNA extraction. All  
139 samples were genotyped via the Multi-Ethnic Genotyping  
140 Array (MEGA<sup>ex</sup>) or Global Screening Array (GSA) genotyping  
141 chips. The MEGA<sup>ex</sup> chip recognized over 2 million loci, and  
142 the GSA chip recognized 660,000 loci. Custom markers  
143 were also included on the MEGA<sup>ex</sup> chip (6,000 SNPs),  
144 including disease-associated loci previously identified in  
145 Amish and European populations.[13,14]

146

## 147 2.3 Genotype Quality Control

148 Initial quality control (QC) was done as previously  
149 described.[15] 256,978 SNPs passed QC across both chips.  
150 After additional pruning for linkage disequilibrium (LD),  
151 167,196 SNPs were used to inform the number of effective  
152 independent tests done in the association analyses.

153

154 Genotyped individuals were filtered for sex discrepancies  
155 and low call rates (<96%). Familial relationships were

verified across samples. Age was defined as follows for all analyses: for CU individuals, age at the last study visit; for CI individuals, age at CI diagnosis. Participants whose age or familial relationships were missing were not included in the current analyses. Additional samples were dropped due to being under 75 years of age ( $n = 748$ ) or a diagnosis other than CI/CU ( $n = 343$ ). After QC, 946 individuals were available for analysis (66% CU; 59% female, Supplementary Table 1). Mean age for both CU and CI individuals was 82 years (Supplementary Figure 1).

## 2.4 Amish Genealogy

To evaluate familial relationships in this dataset, we consulted the Anabaptist Genealogical Database (AGDB).[16] All individuals were connected into a single, large, 14-generation pedigree ( $n=8,222$ ) generated using pedigree[17] (Figure 1A). These relationships were used to correct for relatedness in our genetic analyses. To conduct chromosome-wide genetic linkage analyses smaller pedigrees were required, so PedCut[18] was used to create sub-pedigrees with at least two cognitively preserved individuals in each (see Figure 1B for an example). The 14-generation pedigree was split based on pedigree size, or bit-



size. Bit sizes evaluated were 21 ( $n = 103$  sub-pedigrees) and 22 ( $n = 98$ ) for linkage analysis on the autosomes. An additional 23-bit ( $n = 94$ ) pedigree size was used for linkage analysis on the X chromosome.

183

## 2.5 Principal Component Analysis and Association Analysis

Principal Component Analysis (PCA) was performed via Principal Component Analysis in Related Samples (PC-AiR), part of the GENetic Estimation and Inference in Structured samples (GENESIS) R package.[19] PC-AiR adjusted for cryptic relatedness to generate principal components (PCs) based on the overall population structure, not just family structure. PC-AiR created kinship estimates for each individual based on the pedigree relationship information obtained from the 14-generation pedigree (Figure 1A). Model-free estimation of recent genetic relatedness (PC-Relate)[20] then used the PCs generated from PC-AiR to adjust for the population substructure and ancestry to provide an accurate estimate of recent genetic relatedness due to family structure, correcting for the extensive and complex relatedness in this dataset by generating a Genetic Relationship Matrix (GRM). GENESIS software was then

202 used for association analysis.[19] Association analysis was  
203 completed using covariates of age, sex, and the GRM,  
204 adjusting for the first two PCs.

205  
206 To accommodate the LD structure specific to the Amish, we  
207 used the simpleM method[21–23] to define appropriate  
208 significance thresholds for the study population. SimpleM  
209 uses PCA and linkage disequilibrium (LD) between SNPs to  
210 help estimate the effective number of independent tests for  
211 the dataset. This method generated a significance threshold  
212 of  $6.4 \times 10^{-7}$ .

213  
214 The X chromosome was also investigated for association.  
215 9,852 X-linked SNPs were available after QC. XWAS[24]  
216 was used to perform sex-stratified association testing. Two  
217 tests were performed, one treating males as heterozygous  
218 for SNPs on the X chromosome, and the other treating  
219 males as homozygous for SNPs on the X chromosome, both  
220 yielded to the same results. Age and the first five PCs were  
221 included as covariates.

222

## 2.6 Linkage Analysis

Due to computational complexity, the 14-generation 8,222-person Amish pedigree (Figure 1A) was divided into smaller sub-pedigrees (e.g., Figure 1B) to perform both nonparametric (NPL) and parametric linkage analysis. A total of 295 sub-pedigrees were used in linkage analyses (Supplementary Table 2).

Model-based (parametric) and model-free (nonparametric or NPL) linkage analyses were performed using MERLIN.[25] To test for linkage, the null hypothesis of no linkage was compared to the likelihood of linkage ( $0 \leq \alpha < 0.5$ ) between the phenotype and SNP within each sub-pedigree. A logarithm of the odds (LOD) score was calculated within each sub-pedigree and then summed across sub-pedigrees. In addition, the proportion of sub-pedigrees linked to a particular SNP ( $\alpha$ ) was calculated as part of a heterogeneity LOD score (HLOD).

For parametric two-point and multipoint linkage tests, both dominant and recessive models were tested on sub-pedigrees. These pedigrees each contained at least three but up to 11 CU individuals, with varying numbers of CI

246 individuals ranging from zero to two. For tests modeling a  
247 dominant inheritance model, a trait allele frequency (AF) of  
248 0.001 was used with penetrances of 0.0001, 1.0, and 1.0 for  
249 zero, one, and two copies of the trait allele, respectively. For  
250 the recessive model, the trait AF was 0.05 with penetrance  
251 of 0.0001, 0.0001, and 1.0 for zero, one, and two copies of  
252 the trait allele, respectively.

253  
254 In nonparametric linkage (NPL) and parametric analyses,  
255 both two-point and multipoint linkage was examined. Two-  
256 point NPL and parametric analyses were performed on the  
257 full set of post-QC SNPs ( $n = 256,978$ ), while multipoint NPL  
258 and parametric analyses were carried out on two different  
259 sets of pruned SNPs to minimize the impact of linkage  
260 disequilibrium (LD). An  $r^2$  threshold of 0.16 was used to  
261 define a set of 85,857 pruned SNPs for the multipoint  
262 analyses.[26] MERLIN's  $NPL_{all}$  function was utilized for NPL  
263 analyses to construct a linear model of linkage. LOD and  
264 HLOD scores surpassing the defined thresholds for  
265 suggestive ( $\geq 1.86$ ) and significant linkage ( $\geq 3.3$ )[27] were  
266 examined in more depth.

267

MINX software[25], an extension of MERLIN, was used for X chromosome linkage analysis. For two-point NPL and parametric analyses, a set of 9,852 X chromosome SNPs was used, and for multipoint NPL and parametric analyses, a pruned set of 153 SNPs with an  $r^2 < 0.02$  and  $MAF \geq 0.40$  was used. Multipoint NPL analysis utilized a sex-averaged genetic map[28], and model penetrances, adjusted for males and females, were the same as defined for the autosomal linkage analyses above.

For the subset of the loci where HLOD scores surpassed the significance threshold, 21- and 22-bit pedigrees driving the positive HLOD scores were examined for more distant connections allowing for the construction of larger pedigrees. 21- or 22-bit sub-pedigrees were merged when either identical AGBD IDs or first-degree relative AGBD IDs appeared (see Figure 1C for a larger pedigree example constructed for chromosome 2-linked sub-pedigrees). Six loci, one on each of chromosomes 1, 2, 3, 7, 11 and 17 met significance criteria, and larger pedigrees were possible for five of these loci, the exception being the chromosome 3 locus. MORGAN[29,30] was used to calculate region-specific LOD scores for these larger, more complex

291 pedigrees using both dominant and recessive models. Any  
 292 linkage originally appearing under dominant inheritance  
 293 patterns was verified by MCMC analysis also utilizing  
 294 dominant parameters, recessive results were treated  
 295 similarly.  
 296  
 297 MORGAN allowed for larger pedigrees and provided an  
 298 alternative linkage method, Markov chain Monte Carlo  
 299 (MCMC), to investigate the same loci. The trait allele  
 300 frequency for CU was coded as very rare ( $CU = 0.0001$ ) for  
 301 all analyses, similar to, but slightly more restrictive than  
 302 previous models run with MERLIN, in order to specify a  
 303 single founder for each allele. Additionally, MCMC  
 304 penetrance models utilized the same penetrances specified  
 305 in MERLIN analyses. MCMC was performed with a  
 306 maximum of 8 SNPs, spaced at 1-5 cM intervals. The  
 307 genetic maps generated by Halldorsson et al., 2019 were  
 308 used.[31]  $D'$  and  $r^2$  values were generated specifically for our  
 309 Amish population to verify that the resulting LOD scores  
 310 were not influenced by LD.

311

## 312 3 RESULTS

### 313 3.1 Genome-Wide Association Analysis for 314 Cognitive Preservation

315 No SNPs reached the genome-wide significance threshold  
316 defined by simpleM for this population, but eleven loci  
317 (chromosomes 1, 3, 5, 6, 7, 11, 13, 14, 15, 16) surpassed  
318 the suggestive threshold ( $p \leq 10^{-4}$ ) (Supplementary Table 3  
319 and Figure 2). Genomic inflation was 0.98 after the GRM,  
320 age, and sex covariates were applied to the model  
321 (Supplementary Figure 2A).

322

323 No SNPs on the X chromosome were significant or  
324 suggestive under either sex-stratified model (Figure 2). The  
325 genomic inflation value was 0.98 for the X chromosome  
326 (Supplementary Figure 2B).

327

### 328 3.2 Linkage Analyses for Cognitive Preservation

329 Pedigrees were grouped via bit-size, chosen based on  
330 computational tractability for our analyses. For NPL  
331 analyses, families of bit size 21 and 22 were examined ( $n =$   
332 201). In the two-point NPL analyses, 17 loci on 13

333 chromosomes surpassed the threshold for suggestive  
334 linkage ( $\geq 1.86$ ) (Supplementary Figure 3A). Multipoint NPL  
335 analyses resulted in 10 suggestive loci on 10 different  
336 chromosomes (Supplementary Figure 3B). No SNPs  
337 reached statistical significance in any NPL analysis.  
338  
339 Two-point dominant linkage analyses generated 72  
340 significant ( $\geq 3.3$ ) HLOD results spread across most  
341 chromosomes for both the 21- and 22-bit pedigrees (Figure  
342 3 and Supplementary Figure 4A). In multipoint analyses,  
343 only chromosomes 12 and 17 had significant results for the  
344 dominant model (Supplementary Figure 4B). Two-point  
345 recessive linkage analyses generated significant results on  
346 11 different chromosomes (Supplementary Figure 4C). No  
347 loci reached significance with a multipoint recessive model  
348 (Supplementary Figure 4D). Two-point parametric linkage  
349 analysis on the X chromosome led to 14 loci surpassing the  
350 threshold for suggestive linkage, but no loci were significant.  
351 No SNPs were seen as suggestive or significant in multipoint  
352 analyses on the X chromosome. See Supplemental Tables 3  
353 and 4 for a full list of significant and suggestive loci,  
354 respectively, from linkage analyses.  
355



356    **3.3 Assessment of Significant and Suggestive**  
357    **Genomic Regions**

358    The need to use sub-pedigrees for linkage analysis  
359    introduced an unknown amount of variability into the linkage  
360    analysis calculations.[32] To address this issue, we  
361    implemented an approach to filter the large number of loci  
362    surpassing thresholds for suggestive or significant results in  
363    GWAS and/or linkage. Some differences were seen across  
364    the various bit size pedigrees, therefore, significant HLOD  
365    scores in multiple linkage analyses in the same region were  
366    a requirement for the locus to undergo further investigation.

367    Regions selected for follow-up were required to have 1) two  
368    significant HLOD scores ( $\geq 3.3$ ) in any two linkage analyses  
369    and a significant or suggestive LOD score ( $\geq 1.86$ ) in at least  
370    one other linkage analysis; or 2) one suggestive result in the  
371    GWAS (within 5 Mb), a significant HLOD score in any  
372    linkage analysis, and a suggestive HLOD score in any other  
373    linkage analysis. After applying these criteria, 6 regions of  
374    interest were identified for further investigation, located on  
375    chromosomes 1, 2, 3, 7, 11, and 17 (Table 1). When probing  
376    within a 10 Mb region around each of these loci, we  
377    observed two known AD-related genes (*adsp.niagads.org*),  
378    *PICALM* (chromosome 11) and *EPHA1* (chromosome 7).

379

380 By examining which sub-pedigrees displayed the highest

381 chromosome-specific LOD scores across multiple analyses,

382 it was noted that some of these sub-pedigrees could be

383 connected either by a specific individual or through a first

384 degree relative. These related sub-pedigrees were combined

385 into larger family pedigrees for five of the loci (chromosomes

386 1, 2, 7, 11, and 17), but were unable to be merged for the

387 chromosome 3 locus. These five larger pedigrees were then

388 used for the MCMC linkage analyses.

389

390 Only the chromosome 2 locus, centered around SNP

391 rs1402906, remained significant ( $H_{LOD} = 4.87$ ) after

392 connection of the sub-pedigrees. MCMC analyses with

393 identical parameters were performed to further verify these

394 results, this time adding additional SNPs upstream and

395 downstream of rs1402906 to widen the genomic window

396 considering potential linkage. These additional analyses

397 each considered 5 SNPs, and again rs1402906 retained the

398 highest significance with a dominant model ( $LOD=4.14$ ) (see

399 Table 2 and Figure 4). The rs1402906 T allele frequency is

400 12% in the Amish, compared to 19% in the ALFA European

401 population (dbSNP).[33] Of the 24 CU individuals who had

402 genotype data available, the genotype counts for rs1402906  
403 were 7 TT, 12 CT, and 3 CC (Supplementary Table 6).  
404 These CU individuals in the chromosome 2-linked pedigree  
405 were all under 88 years of age. There were two CI  
406 individuals in the chromosome 2-linked pedigree, both  
407 displayed the CC genotype at rs1402906 and were >89  
408 years. Despite the co-segregation of the T allele with most  
409 CU individuals in this pedigree, the genotype frequencies are  
410 essentially the same between CU and CI individuals in the  
411 entire Amish population in the study (Supplementary Table  
412 6).

413

### 414 3.4 Chromosome 2p *in Silico* Annotation

415 The UCSC genome browser was used to identify protein  
416 coding genes on chromosome 2p11.2-13.1 spanning 10 cM  
417 around the peak LOD score at rs1402906.[34] The protein  
418 coding genes in this region include *REG1A*, *REG1B*,  
419 *CTNNA2*, and *LRRTM1* and *LRRTM4* (Figure 5). In  
420 addition, the Open Targets Platform eQTL and PheWAS  
421 databases specified an eQTL associated with decreased  
422 *CTNNA2* expression with the “T” allele at rs1402906, as well  
423 as an increased incidence within a study population of  
424 individuals with autism.[35,36] The PheWAS database also

425 indicated a miniscule, but still significant, diminishment within  
426 a study population of Bipolar individuals.  
427  
428 Sequences around the SNP demonstrating the peak LOD  
429 score, rs1402906, were investigated for potential promoter  
430 regions in the Eukaryotic Promoter Database (EPD)[37], as  
431 well as analyzed through PROMO, a transcription factor  
432 binding site (TFBS) identification tool developed by  
433 ALGGEN.[38,39] Cap Analysis of Gene Expression (CAGE)  
434 reads from the FANTOM5 project were also examined to  
435 investigate transcription start sites (TSS).[40]  
436  
437 Although the 2p11.2-13.1 genomic region is relatively devoid  
438 of known genes, examination of transcription factor binding  
439 sites in this region via ALGGEN shows the transcription  
440 factor POU3F2 as having a perfect binding site consensus  
441 beginning 4bp upstream of rs1402906 when the genomic  
442 sequence contained the T allele at rs1402906.[41]  
443 Substitution of the alternative allele C nearly abolished the  
444 binding potential for POU3F2, with a low predicted binding  
445 score due to two base-pair mismatches in the recognition  
446 sequence. Another transcription factor, POU1F1a,  
447 demonstrates a perfect binding consensus 10bp upstream of

rs1402906. However, the alleles at rs1402906 do not disrupt the binding. Utilizing the EPD as well as CAGE reads uncovered HK3me1, HK3me3, and H3K27ac sites within 10bp of rs1402906, indicating a potential TSS as well as predicted enhancer activity.[42,43]

#### 4 DISCUSSION

Identifying protective genetic loci as a strategy for finding potential therapeutic targets is a methodology that yields higher success rates for clinical trials than other approaches.[6] For dementia, protective loci are associated with an outcome of cognitive preservation, which can result from either cognitive resilience or resistance. Cognitive resilience is observed when patients display typical dementia pathology, specifically a buildup of amyloid plaques and tangles in the brain in AD, without demonstrating any cognitive impairment or other dementia symptoms.[44] Cognitive resistance is defined by a lack of dementia-associated symptoms without presenting dementia pathologies.[44] As the Amish undergo only pre-mortem diagnosis, their classification falls under cognitive preservation, which is either cognitive resilient or resistant. Previous studies for AD have identified multiple genes that

471 possess alleles that appear to confer some protection  
 472 against developing AD including, *APP*[45], *APOE*  $\epsilon$ 2[46],  
 473 *PLCG2*[47], *MS4A*[48], *ABCA1*[49], *RAB10*[50], *SORL1*[51],  
 474 *PICALM*[52], *EPHA1*[4], and *CASS4*[4]. Although our *ad hoc*  
 475 filtering suggested possible effects near *PICALM* and  
 476 *EPHA1*, no SNPs in either gene demonstrated a protective  
 477 effect.  
 478  
 479 GWAS and linkage analyses identified 106 suggestive or  
 480 significant loci for cognitive preservation in the Amish  
 481 (Supplemental Table 3). To limit false positives, we focused  
 482 only on areas yielding suggestive or significant associations  
 483 in multiple analyses. This limited our results to six areas of  
 484 interest across chromosomes 1, 2, 3, 7, 11, and 17 (Table 1  
 485 and Table 2). Notably, an effect of *APOE*  $\epsilon$ 2 was not  
 486 detected in any analysis, however this is likely because of  
 487 *APOE*  $\epsilon$ 3's high allele frequency within the Amish and its  
 488 neutral phenotypic outcome, thereby preventing its  
 489 enrichment in either the case or control groups. *APOE*  $\epsilon$ 2  
 490 was infrequent in this Amish population, with an allele  
 491 frequency of just 4.2%, compared to 19.5% in non-Hispanic  
 492 white populations,[53] making it likely too rare for analyses to  
 493 detect. A region on chromosome 2p11.2-13.1, centered

494 around rs1402906, demonstrated statistical significance  
495 consistently across multiple linkage analyses. By connecting  
496 several of the sub-pedigrees, we confirmed the transmission,  
497 providing additional evidence of linkage.

498

499 Because significant allelic association or genetic linkage  
500 results do not necessarily identify causal variations, a 10 Mb  
501 region around the chromosome 2 locus peak was evaluated  
502 to develop a broader assessment of possible functional  
503 elements. While this region was not accompanied by  
504 association in the GWAS, PROMO predicted a POU3F2  
505 TFBS with perfect consensus beginning 4bp upstream of  
506 rs1402906 when the genomic sequence contained the T  
507 allele. Though there remained a possibility of binding in the  
508 presence of the C allele at that site, consensus was  
509 markedly diminished as any potential binding would require  
510 only partial adherence to the site, with two of the seven base  
511 pairs in the binding locus being mismatched.[41] A majority  
512 (87%) of the individuals demonstrating cognitive  
513 preservation in the chromosome 2-linked pedigree (Figure  
514 1C and Figure 4) have this T allele. Of the three CC-  
515 genotyped CU individuals, two married into the pedigree  
516 (i.e., were not otherwise closely related to the other pedigree

members), with the third CC genotyped individual (age 80) being below the average age of onset for CI in the Amish population (age 82) and a child of one of the married-ins. Additionally, the average age of onset for CI was 89.5 in this chromosome 2-linked pedigree used for MCMC analysis, implying that these individuals may still be too young to display CI onset or may have other protective factors located elsewhere in the genome as the average age of onset for this family is older than the general Amish population.

POU3F2 is a known regulator of the nearby gene *Leucine Rich Repeat Transmembrane neuronal 4 (LRRTM4)*.<sup>[54]</sup> The leucine-rich repeat transmembrane proteins (LRRTMs) are primarily expressed in the nervous system where they assist in synaptic differentiation and development.<sup>[55,56]</sup> Murine *in vivo* studies demonstrated that reduced *LRRTM4* expression led to deficits in excitatory synapse density in dentate gyrus granule cells.<sup>[57]</sup> Increased expression of *LRRTM4* in the hippocampus improves memory in aging rats.<sup>[58]</sup> Clinically, *LRRTM4* has been associated with Tourette syndrome and autism spectrum disorder, as well as increased risk of suicide attempt in bipolar disorder.<sup>[59,60]</sup> It is possible that altered transcription in an upstream



540 regulatory region, possibly due to the potential for POU3F2  
541 binding, may play a role in expression differences of  
542 *LRRTM4*, which could further contribute to improved  
543 cognitive ability in CU patients, as observed in rodent  
544 models.  
545  
546 In eQTL and PheWAS databases searched, the “T” allele at  
547 rs1402906 was associated with increased incidence of  
548 autism spectrum disorder as well as lower *CTNNA2*  
549 expression. Notably, the POU1F1a TF also had perfect  
550 consensus binding in the region containing rs1402906 and  
551 POU1F1a regulates the *CTNNA2* gene[61]. POU1F1a  
552 overexpression induces increased expression of *Leucine*  
553 *Rich Repeat Transmembrane neuronal 1 (LRRTM1)*,[61] a  
554 gene 312 kb away from rs1402906 and within the region of  
555 significant linkage on 2p11.2-13.1. *LRRTM1* is highly  
556 expressed in the brain and is associated with handedness  
557 and schizophrenia in humans.[62] Deletions of this gene lead  
558 to hippocampal shrinking, loss of synaptic density, reduced  
559 long-term potentiation in hippocampal neurons, and memory  
560 deficiencies in mice.[63,64]  
561

562 *LRRTM1* resides within the seventh intron of the *Catenin*  
563 *Alpha 2 (CTNNA2)* gene in an anti-sense orientation, 262kb  
564 away from rs1402906. *CTNNA2* shares promoters with  
565 *LRRTM1*. [65] These shared promoters induce alternative  
566 transcripts of *CTNNA2* containing additional 5' exons  
567 expressed almost exclusively in the brain. Importantly, these  
568 promoters are bi-directional and may regulate both *LRRTM1*  
569 and the alternative splicing of *CTNNA2* as a single functional  
570 unit. [66] Exon VIIb of *CTNNA2*, located on the sense strand  
571 corresponding to the *LRRTM1* location, is included more  
572 frequently in transcription than other alternative exons,  
573 especially in the brain. The ratio of expression levels of full-  
574 length *CTNNA2* and this isoform may be important for  
575 regulating cadherin-dependent adhesion. [66] We note that a  
576 previous publication from our group using a subset of our  
577 Amish dataset found linkage to dementia in the region  
578 surrounding *CTNNA2* and suggested it as a potential risk  
579 locus for dementia. [32] Here, the "T" allele at rs1402906,  
580 linked to cognitive preservation, was an eQTL noted to  
581 decrease *CTNNA2* expression.

582

583 *CTNNA2* is highly expressed in the brain in both mice and  
584 humans. [32,67] It is well categorized in mice, where it

585 regulates function during murine neuronal development,  
586 specifically synapse formation and plasticity.[67]  
587 Mechanistically, *CTNNA2* regulates synaptic spine  
588 formation, stabilization, and turnover.[68] *CTNNA2* also  
589 forms a complex with beta-catenin, which interacts with  
590 presenilin, a known contributor to AD pathology.  
591 Destabilization of this beta-catenin complex can lead to  
592 neuronal apoptosis in mice and humans.[69] The location of  
593 potential POU3F2 and POU1F1a binding sites at rs1402906,  
594 near HK3me1, HK3me3, and H3K27ac sites indicate  
595 predicted enhancer activity nearby a TSS. Thus, POU1F1a  
596 binding may initiate transcription of either *LRRTM1*, an  
597 alternative splicing variant of *CTNNA2*, or both, as  
598 transcription of these genes has been shown to be  
599 coregulated, with multiple TSSs for each gene existing within  
600 30 bps of each other.[66] Similarly, POU3F2 binding may  
601 initiate altered transcription of *LRRTM4*, another gene  
602 involved in neurocognition.[58]  
603  
604 Our analyses highlight the genetic complexity of cognitive  
605 preservation in the Amish, with different sub-pedigrees  
606 appearing to drive disparate regions of the genome  
607 associated with cognitive preservation. Numerous regions

608 yielded significant or suggestive results, but a region on  
609 chromosome 2p11.2-13.1 showed the most robust linkage in  
610 an area previously associated with dementia in the Amish,  
611 suggesting the possibility of both protective and risk  
612 regulatory elements for cognition in this region of the  
613 genome. These results lay the foundation for additional  
614 studies to identify loci conferring protection against cognitive  
615 impairment.

616

## 617 5 REFERENCES

- 618 [1] 2021 Alzheimer's disease facts and figures.  
619 Alzheimers Dement 2021;17:327–406.  
620 <https://doi.org/10.1002/ALZ.12328>.
- 621 [2] Kunkle BW, Grenier-Boley B, Sims R, Bis JC,  
622 Damotte V, Naj AC, et al. Genetic meta-analysis  
623 of diagnosed Alzheimer's disease identifies new  
624 risk loci and implicates A $\beta$ , tau, immunity and  
625 lipid processing. Nat Genet 2019;51:414–30.  
626 <https://doi.org/10.1038/s41588-019-0358-2>.
- 627 [3] Williamson J, Goldman J, Marder KS. Genetic  
628 Aspects of Alzheimer Disease. Neurologist  
629 2009;15:80.  
630 [https://doi.org/10.1097/NRL.0B013E318187E76](https://doi.org/10.1097/NRL.0B013E318187E76B)  
631 B.
- 632 [4] Lambert JC, Ibrahim-Verbaas CA, Harold D, Naj  
633 AC, Sims R, Bellenguez C, et al. Meta-analysis  
634 of 74,046 individuals identifies 11 new  
635 susceptibility loci for Alzheimer's disease. Nature  
636 Genetics 2013 45:12 2013;45:1452–8.  
637 <https://doi.org/10.1038/ng.2802>.

- 638 [5] Asher S, Priefer R. Alzheimer's disease failed  
639 clinical trials. Life Sci 2022;306:120861.  
640 <https://doi.org/10.1016/J.LFS.2022.120861>.
- 641 [6] Harper AR, Nayee S, Topol EJ. Protective  
642 alleles and modifier variants in human health  
643 and disease. Nat Rev Genet 2015;16:689–701.  
644 <https://doi.org/10.1038/NRG4017>.
- 645 [7] Strauss KA, Puffenberger EG. Genetics,  
646 medicine, and the Plain people. Annu Rev  
647 Genomics Hum Genet 2009;10:513–36.  
648 [https://doi.org/10.1146/ANNUREV-GENOM-](https://doi.org/10.1146/ANNUREV-GENOM-082908-150040)  
649 [082908-150040](https://doi.org/10.1146/ANNUREV-GENOM-082908-150040).
- 650 [8] Crowley WK. OLD ORDER AMISH  
651 SETTLEMENT: DIFFUSION AND GROWTH.  
652 Annals of the Association of American  
653 Geographers 1978;68:249–64.  
654 [https://doi.org/10.1111/J.1467-](https://doi.org/10.1111/J.1467-8306.1978.TB01194.X)  
655 [8306.1978.TB01194.X](https://doi.org/10.1111/J.1467-8306.1978.TB01194.X).
- 656 [9] Welsh KA, Butters N, Mohs RC, Beekly D,  
657 Edland S, Fillenbaum G, et al. The Consortium  
658 to Establish a Registry for Alzheimer's Disease  
659 (CERAD). Part V. A normative study of the  
660 neuropsychological battery. Neurology  
661 1994;44:609–609.  
662 <https://doi.org/10.1212/WNL.44.4.609>.
- 663 [10] Teng E, Chui H. The Modified Mini-Mental State  
664 (3MS) examination. J Clin Psychiatry  
665 1987;48:314–8.
- 666 [11] Galvin JE, Roe CM, Morris JC. Evaluation of  
667 Cognitive Impairment in Older Adults: Combining  
668 Brief Informant and Performance Measures.  
669 Arch Neurol 2007;64:718–24.  
670 <https://doi.org/10.1001/ARCHNEUR.64.5.718>.
- 671 [12] Arnett JA, Labovitz SS. Effect of Physical Layout  
672 in Performance of the Trail Making Test. vol. 7.  
673 1995.
- 674 [13] Kuzma A, Valladares O, Cweibel R, Greenfest-  
675 Allen E, Childress DM, Malamon J, et al.  
676 NIAGADS: The NIA Genetics of Alzheimer's

- 677 Disease Data Storage Site. Alzheimer's &  
678 Dementia 2016;12:1200–3.  
679 <https://doi.org/10.1016/J.JALZ.2016.08.018>.
- 680 [14] Beecham GW, Bis JC, Martin ER, Choi SH,  
681 DeStefano AL, Van Duijn CM, et al. The  
682 Alzheimer's Disease Sequencing Project: Study  
683 design and sample selection. *Neurol Genet*  
684 2017;3.  
685 <https://doi.org/10.1212/NXG.0000000000000194>  
686 .
- 687 [15] Osterman MD, Song YE, Adams LD, Laux RA,  
688 Caywood LJ, Prough MB, et al. The genetic  
689 architecture of Alzheimer disease risk in the  
690 Ohio and Indiana Amish. *Human Genetics and*  
691 *Genomics Advances* 2022;3:100114.  
692 <https://doi.org/10.1016/J.XHGG.2022.100114>.
- 693 [16] Agarwala R, Biesecker LG, Schäffer AA.  
694 Anabaptist genealogy database. *American*  
695 *Journal of Medical Genetics - Seminars in*  
696 *Medical Genetics* 2003;121 C:32–7.  
697 <https://doi.org/10.1002/ajmg.c.20004>.
- 698 [17] Garbe JR, Da Y. A software tool for the  
699 graphical visualization of large and complex  
700 populations. *Yi Chuan Xue Bao* 2003;30:1193–  
701 5.
- 702 [18] Liu F, Kirichenko A, Axenovich TI, Van Duijn  
703 CM, Aulchenko YS. An approach for cutting  
704 large and complex pedigrees for linkage  
705 analysis. *European Journal of Human Genetics*  
706 2008;16:854–60.  
707 <https://doi.org/10.1038/ejhg.2008.24>.
- 708 [19] Gogarten SM, Sofer T, Chen H, Yu C, Brody JA,  
709 Thornton TA, et al. Genetic association testing  
710 using the GENESIS R/Bioconductor package  
711 n.d.  
712 <https://doi.org/10.1093/bioinformatics/btz567>.
- 713 [20] Conomos MP, Reiner AP, Weir BS, Thornton  
714 TA. Model-free Estimation of Recent Genetic

- 715 Relatedness. *Am J Hum Genet* 2016;98:127.  
716 <https://doi.org/10.1016/J.AJHG.2015.11.022>.
- 717 [21] Gao X, Becker LC, Becker DM, Starmer JD,  
718 Province MA. Brief Report Avoiding the High  
719 Bonferroni Penalty in Genome-Wide Association  
720 Studies. *Genet Epidemiol* 2010;34:100–5.  
721 <https://doi.org/10.1002/gepi.20430>.
- 722 [22] Gao X, Starmer J, Martin ER. A Multiple Testing  
723 Correction Method for Genetic Association  
724 Studies Using Correlated Single Nucleotide  
725 Polymorphisms. *Genet Epidemiol* 2008;32:361–  
726 9. <https://doi.org/10.1002/gepi.20310>.
- 727 [23] Gao X. Multiple Testing Corrections for Imputed  
728 SNPs. *Genet Epidemiol* 2011;35:154–8.  
729 <https://doi.org/10.1002/gepi.20563>.
- 730 [24] Gao F, Chang D, Biddanda A, Ma L, Guo Y,  
731 Zhou Z, et al. XWAS: A Software Toolset for  
732 Genetic Data Analysis and Association Studies  
733 of the X Chromosome. *Journal of Heredity*  
734 2015;666–71.  
735 <https://doi.org/10.1093/jhered/esv059>.
- 736 [25] Abecasis GR, Cherny SS, Cookson WO, Cardon  
737 LR. Merlin-rapid analysis of dense genetic maps  
738 using sparse gene flow trees 2002.  
739 <https://doi.org/10.1038/ng786>.
- 740 [26] Boyles AL, Scott WK, Martin ER, Schmidt S, Li  
741 YJ, Ashley-Koch A, et al. Linkage disequilibrium  
742 inflates type I error rates in multipoint linkage  
743 analysis when parental genotypes are missing.  
744 *Hum Hered* 2005;59:220–7.  
745 <https://doi.org/10.1159/000087122>.
- 746 [27] Ott J, Wang J, Leal SM. Genetic linkage analysis  
747 in the age of whole-genome sequencing. *Nat*  
748 *Rev Genet* 2015;16:275.  
749 <https://doi.org/10.1038/NRG3908>.
- 750 [28] MERLIN Quick Reference n.d.  
751 [https://csg.sph.umich.edu/abecasis/Merlin/refere](https://csg.sph.umich.edu/abecasis/Merlin/reference.html)  
752 [nce.html](https://csg.sph.umich.edu/abecasis/Merlin/reference.html) (accessed November 1, 2023).

- 753 [29] Wijsman EM, Rothstein JH, Thompson EA.  
754 Multipoint Linkage Analysis with Many  
755 Multiallelic or Dense Diallelic Markers: Markov  
756 Chain–Monte Carlo Provides Practical  
757 Approaches for Genome Scans on General  
758 Pedigrees. *Am J Hum Genet* 2006;79:846.  
759 <https://doi.org/10.1086/508472>.
- 760 [30] Tong L, Thompson E. Multilocus lod scores in  
761 large pedigrees: combination of exact and  
762 approximate calculations. *Hum Hered*  
763 2008;65:142–53.  
764 <https://doi.org/10.1159/000109731>.
- 765 [31] Halldorsson B V., Palsson G, Stefansson OA,  
766 Jonsson H, Hardarson MT, Eggertsson HP, et  
767 al. Characterizing mutagenic effects of  
768 recombination through a sequence-level genetic  
769 map. *Science* 2019;363.  
770 <https://doi.org/10.1126/SCIENCE.AAU1043>.
- 771 [32] Cummings AC, Jiang L, Velez Edwards DR,  
772 Mccauley JL, Laux R, Mcfarland LL, et al.  
773 Genome-wide association and linkage study in  
774 the Amish detects a novel candidate late-onset  
775 Alzheimer disease gene. *Ann Hum Genet*  
776 2012;76:342–51. <https://doi.org/10.1111/J.1469-1809.2012.00721.X>.
- 778 [33] Phan L, Jin Y, Zhang H, Qiang W, Shekhtman E,  
779 Shao D, et al. ALFA: Allele Frequency  
780 Aggregator. National Center for Biotechnology  
781 Information, US National Library of Medicine  
782 2020. [www.ncbi.nlm.nih.gov/snp/docs/gsr/alfa/](http://www.ncbi.nlm.nih.gov/snp/docs/gsr/alfa/)  
783 (accessed July 3, 2023).
- 784 [34] Rao SSP, Huntley MH, Durand NC, Stamenova  
785 EK, Bochkov ID, Robinson JT, et al. A 3D map  
786 of the human genome at kilobase resolution  
787 reveals principles of chromatin looping. *Cell*  
788 2014;159:1665–80.  
789 <https://doi.org/10.1016/j.cell.2014.11.021>.
- 790 [35] Mountjoy E, Schmidt EM, Carmona M,  
791 Schwartzentruber J, Peat G, Miranda A, et al. An  
792 open approach to systematically prioritize causal



- 793 variants and genes at all published human  
794 GWAS trait-associated loci. *Nat Genet*  
795 2021;53:1527–33.  
796 <https://doi.org/10.1038/S41588-021-00945-5>.
- 797 [36] Ghoussaini M, Mountjoy E, Carmona M, Peat G,  
798 Schmidt EM, Hercules A, et al. Open Targets  
799 Genetics: systematic identification of trait-  
800 associated genes using large-scale genetics and  
801 functional genomics. *Nucleic Acids Res*  
802 2021;49:D1311–20.  
803 <https://doi.org/10.1093/NAR/GKAA840>.
- 804 [37] Dreos R, Ambrosini G, Groux R, Perier RC,  
805 Bucher P. The eukaryotic promoter database in  
806 its 30th year: focus on non-vertebrate  
807 organisms. *Nucleic Acids Res* 2017;45:D51–5.  
808 <https://doi.org/10.1093/NAR/GKW1069>.
- 809 [38] Messeguer X, Escudero R, Farré D, Núñez O,  
810 Martínez J, Albà MM. PROMO: detection of  
811 known transcription regulatory elements using  
812 species-tailored searches. *Bioinformatics*  
813 2002;18:333–4.  
814 [https://doi.org/10.1093/BIOINFORMATICS/18.2.](https://doi.org/10.1093/BIOINFORMATICS/18.2.333)  
815 333.
- 816 [39] Farré D, Roset R, Huerta M, Adsuar JE,  
817 Roselló L, Albà MM, et al. Identification of  
818 patterns in biological sequences at the ALGGEN  
819 server: PROMO and MALGEN. *Nucleic Acids*  
820 *Res* 2003;31:3651.  
821 <https://doi.org/10.1093/NAR/GKG605>.
- 822 [40] Noguchi S, Arakawa T, Fukuda S, Furuno M,  
823 Hasegawa A, Hori F, et al. FANTOM5 CAGE  
824 profiles of human and mouse samples. *Scientific*  
825 *Data* 2017 4:1 2017;4:1–10.  
826 <https://doi.org/10.1038/sdata.2017.112>.
- 827 [41] Ison J, Rapacki K, Ménager H, Kalaš M, Rydza  
828 E, Chmura P, et al. Tools and data services  
829 registry: a community effort to document  
830 bioinformatics resources. *Nucleic Acids Res*  
831 2016;44:D38–47.  
832 <https://doi.org/10.1093/NAR/GKV1116>.

- 833 [42] Barski A, Cuddapah S, Cui K, Roh TY, Schones  
834 DE, Wang Z, et al. High-resolution profiling of  
835 histone methylations in the human genome. *Cell*  
836 2007;129:823–37.  
837 <https://doi.org/10.1016/J.CELL.2007.05.009>.
- 838 [43] Sayers EW, Bolton EE, Brister JR, Canese K,  
839 Chan J, Comeau DC, et al. Database resources  
840 of the national center for biotechnology  
841 information. *Nucleic Acids Res* 2022;50:D20–6.  
842 <https://doi.org/10.1093/NAR/GKAB1112>.
- 843 [44] Arenaza-Urquijo EM, Vemuri P. Resistance vs  
844 resilience to Alzheimer disease: Clarifying  
845 terminology for preclinical studies. *Neurology*  
846 2018;90:695.  
847 <https://doi.org/10.1212/WNL.0000000000005303>  
848 .
- 849 [45] Kero M, Paetau A, Polvikoski T, Tanskanen M,  
850 Sulkava R, Jansson L, et al. Amyloid precursor  
851 protein (APP) A673T mutation in the elderly  
852 Finnish population. *Neurobiol Aging*  
853 2013;34:1518.e1-1518.e3.  
854 [https://doi.org/10.1016/J.NEUROBIOLAGING.20](https://doi.org/10.1016/J.NEUROBIOLAGING.2012.09.017)  
855 [12.09.017](https://doi.org/10.1016/J.NEUROBIOLAGING.2012.09.017).
- 856 [46] Locke PA, Conneally PM, Tanzi RE, Gusella JF,  
857 Haines JL. Apolipoprotein E4 allele and  
858 Alzheimer disease: examination of allelic  
859 association and effect on age at onset in both  
860 early- and late-onset cases. *Genet Epidemiol*  
861 1995;12:83–92.  
862 <https://doi.org/10.1002/GEPI.1370120108>.
- 863 [47] Sims R, Van Der Lee SJ, Naj AC, Bellenguez C,  
864 Badarinarayan N, Jakobsdottir J, et al. Rare  
865 coding variants in PLCG2, ABI3, and TREM2  
866 implicate microglial-mediated innate immunity in  
867 Alzheimer's disease. *Nature Genetics* 2017 49:9  
868 2017;49:1373–84.  
869 <https://doi.org/10.1038/ng.3916>.
- 870 [48] Jiao B, Liu X, Zhou L, Wang MH, Zhou Y, Xiao  
871 T, et al. Polygenic Analysis of Late-Onset  
872 Alzheimer's Disease from Mainland China. *PLoS*

- 873 One 2015;10:e0144898.  
874 <https://doi.org/10.1371/JOURNAL.PONE.0144898>.  
875 8.
- 876 [49] Wang F, Jia J. Polymorphisms of cholesterol  
877 metabolism genes CYP46 and ABCA1 and the  
878 risk of sporadic Alzheimer's disease in Chinese.  
879 Brain Res 2007;1147:34–8.  
880 <https://doi.org/10.1016/J.BRAINRES.2007.02.005>.  
881 5.
- 882 [50] Ridge PG, Karch CM, Hsu S, Arano I, Teerlink  
883 CC, Ebbert MTW, et al. Linkage, whole genome  
884 sequence, and biological data implicate variants  
885 in RAB10 in Alzheimer's disease resilience.  
886 Genome Med 2017;9:1–14.  
887 [https://doi.org/10.1186/S13073-017-0486-](https://doi.org/10.1186/S13073-017-0486-1)  
888 1/TABLES/4.
- 889 [51] Chou CT, Liao YC, Lee WJ, Wang SJ, Fuh JL.  
890 SORL1 gene, plasma biomarkers, and the risk of  
891 Alzheimer's disease for the Han Chinese  
892 population in Taiwan. Alzheimers Res Ther  
893 2016;8:1–9. [https://doi.org/10.1186/S13195-016-](https://doi.org/10.1186/S13195-016-0222-X)  
894 0222-X/TABLES/4.
- 895 [52] Santos-Rebouças CB, Gonçalves AP, dos  
896 Santos JM, Abdala BB, Motta LB, Laks J, et al.  
897 rs3851179 Polymorphism at 5' to the PICALM  
898 Gene is Associated with Alzheimer and  
899 Parkinson Diseases in Brazilian Population.  
900 Neuromolecular Med 2017;19:293–9.  
901 [https://doi.org/10.1007/S12017-017-8444-](https://doi.org/10.1007/S12017-017-8444-Z)  
902 Z/TABLES/2.
- 903 [53] Beydoun MA, Weiss J, Beydoun HA, Hossain S,  
904 Maldonado AI, Shen B, et al. Race, APOE  
905 genotypes, and cognitive decline among middle-  
906 aged urban adults. Alzheimers Res Ther  
907 2021;13:1–16. [https://doi.org/10.1186/S13195-](https://doi.org/10.1186/S13195-021-00855-Y)  
908 021-00855-Y/FIGURES/3.
- 909 [54] Rouillard AD, Gundersen GW, Fernandez NF,  
910 Wang Z, Monteiro CD, McDermott MG, et al.  
911 The harmonizome: a collection of processed  
912 datasets gathered to serve and mine

913 knowledge about genes and proteins. Database  
914 2016;2016.  
915 <https://doi.org/10.1093/DATABASE/BAW100>.

916 [55] Laurén J, Airaksinen MS, Saarma M, Timmusk  
917 T. A novel gene family encoding leucine-rich  
918 repeat transmembrane proteins differentially  
919 expressed in the nervous system. Genomics  
920 2003;81:411–21. [https://doi.org/10.1016/S0888-](https://doi.org/10.1016/S0888-7543(03)00030-2)  
921 [7543\(03\)00030-2](https://doi.org/10.1016/S0888-7543(03)00030-2).

922 [56] Linhoff MW, Laurén J, Cassidy RM, Dobie FA,  
923 Takahashi H, Nygaard HB, et al. An unbiased  
924 expression screen for synaptogenic proteins  
925 identifies the LRRTM protein family as synaptic  
926 organizers. Neuron 2009;61:734–49.  
927 <https://doi.org/10.1016/J.NEURON.2009.01.017>.

928 [57] Siddiqui TJ, Tari PK, Connor SA, Zhang P,  
929 Dobie FA, She K, et al. An LRRTM4-HSPG  
930 complex mediates excitatory synapse  
931 development on dentate gyrus granule cells.  
932 Neuron 2013;79:680–95.  
933 <https://doi.org/10.1016/j.neuron.2013.06.029>.

934 [58] Flores-Páez LA, Pacheco-Rosado J, Alva-  
935 Sánchez C, Zamudio SR. Cerebrolysin  
936 enhances the expression of the synaptogenic  
937 protein LRRTM4 in the hippocampus and  
938 improves learning and memory in senescent  
939 rats. Behavioural Pharmacology 2020;31:491–9.  
940 <https://doi.org/10.1097/FBP.0000000000000530>.

941 [59] Clarke RA, Eapen V. LRRTM4 Terminal Exon  
942 Duplicated in Family with Tourette Syndrome,  
943 Autism and ADHD. Genes (Basel) 2022;13.  
944 <https://doi.org/10.3390/GENES13010066>.

945 [60] Willour VL, Seifuddin F, Mahon PB, Jancic D,  
946 Pirooznia M, Steele J, et al. A genome-wide  
947 association study of attempted suicide. Mol  
948 Psychiatry 2012;17:433.  
949 <https://doi.org/10.1038/MP.2011.4>.

950 [61] Herman JP, Jullien N, Guillen S, Enjalbert A,  
951 Pellegrini I, Franc JL. Research Resource: A

- 952 Genome-Wide Study Identifies Potential New  
953 Target Genes for POU1F1. *Molecular*  
954 *Endocrinology* 2012;26:1455–63.  
955 <https://doi.org/10.1210/ME.2011-1308>.
- 956 [62] Francks C, Maegawa S, Laurén J, Abrahams  
957 BS, Velayos-Baeza A, Medland SE, et al.  
958 LRRTM1 on chromosome 2p12 is a maternally  
959 suppressed gene that is associated paternally  
960 with handedness and schizophrenia. *Mol*  
961 *Psychiatry* 2007;12:1129.  
962 <https://doi.org/10.1038/SJ.MP.4002053>.
- 963 [63] Bhouri M, Morishita W, Temkin P, Goswami D,  
964 Kawabe H, Brose N, et al. Deletion of LRRTM1  
965 and LRRTM2 in adult mice impairs basal AMPA  
966 receptor transmission and LTP in hippocampal  
967 CA1 pyramidal neurons. *Proc Natl Acad Sci U S*  
968 *A* 2018;115:E5382–9.  
969 <https://doi.org/10.1073/PNAS.1803280115>.
- 970 [64] Dhume SH, Connor SA, Mills F, Tari PK, Au-  
971 Yeung SHM, Karimi B, et al. Distinct but  
972 overlapping roles of LRRTM1 and LRRTM2 in  
973 developing and mature hippocampal circuits.  
974 *Elife* 2022;11.  
975 <https://doi.org/10.7554/ELIFE.64742>.
- 976 [65] Kask M, Pruunsild P, Timmusk T. Bidirectional  
977 transcription from human LRRTM2/CTNNA1 and  
978 LRRTM1/CTNNA2 gene loci leads to expression  
979 of N-terminally truncated CTNNA1 and CTNNA2  
980 isoforms. *Biochem Biophys Res Commun*  
981 2011;411:56–61.  
982 <https://doi.org/10.1016/J.BBRC.2011.06.085>.
- 983 [66] Trinklein ND, Force Aldred S, Hartman SJ,  
984 Schroeder DI, Otilar RP, Myers RM. An  
985 abundance of bidirectional promoters in the  
986 human genome. *Genome Res* 2004;14:62–6.  
987 <https://doi.org/10.1101/GR.1982804>.
- 988 [67] Park C, Falls W, Finger JH, Longo-Guess CM,  
989 Ackerman SL. Deletion in *Catna2*, encoding  
990 alpha N-catenin, causes cerebellar and  
991 hippocampal lamination defects and impaired

- 992                   startle modulation. Nat Genet 2002;31:279–84.  
 993                   <https://doi.org/10.1038/NG908>.
- 994           [68] Abe K, Chisaka O, Van Roy F, Takeichi M.  
 995                   Stability of dendritic spines and synaptic  
 996                   contacts is controlled by  $\alpha$ N-catenin. Nature  
 997                   Neuroscience 2004 7:4 2004;7:357–63.  
 998                   <https://doi.org/10.1038/nn1212>.
- 999           [69] Zhang Z, Hartmann H, Do VM, Abramowski D,  
 1000                   Sturchler-Pierrat C, Staufienbiel M, et al.  
 1001                   Destabilization of beta-catenin by mutations in  
 1002                   presenilin-1 potentiates neuronal apoptosis.  
 1003                   Nature 1998;395:698–702.  
 1004                   <https://doi.org/10.1038/27208>.

1005

## 1006           6 AUTHOR CONTRIBUTIONS

1007           Jonathan L Haines, William K Scott, and Margaret A  
 1008           Pericak-Vance helped design the study and obtain  
 1009           funding for this research. Ascertainment of data was  
 1010           collected and managed by Renee A Laux, Kristy L  
 1011           Miskimen, M Denise Fuzzell, Sarada L Fuzzell, Sherri  
 1012           D Hochstetler, Laura J Caywood, Jason E Clouse, and  
 1013           Sharlene D Herington. Cognitive status was  
 1014           determined by Michael L Cuccaro, Paula K Ogrocki,  
 1015           Alan J Lerner, and Jeffery M Vance. Yeunjoo E Song,  
 1016           Leighanne R Main, Michael D Osterman, Audrey Lynn,  
 1017           Daniel A Dorfsman, Larry D Adams, and Michael B  
 1018           Prough provided data management, organization, and  
 1019           QC. Analyses were performed by Leighanne R Main,

1020 with assistance from Yeunjoo Song and Michael D.  
1021 Osterman. Manuscript writing and drafting was  
1022 performed by Jonathan L Haines, Audrey Lynn, and  
1023 Leighanne R Main. Editing completed by all authors.

1024

## 1025 7 ACKNOWLEDGMENTS

1026 This research was supported under the National  
1027 institutes of Health and National Institute on Aging,  
1028 grant AG058066. This research was also supported by  
1029 an Alzheimer's Disease Translational Data Science  
1030 Training Grant, 5T32AG071474-02.

1031

## 1032 8 CONFLICT OF INTEREST STATEMENT

1033 The authors declare no conflicts of interest.

1034

## 1035 9 CONSENT STATEMENT

1036 All individuals ascertained in this study supplied written  
1037 informed consent under protocols approved by the  
1038 IRBs at Case Western Reserve University and the  
1039 University of Miami.

1040

## 1041 10 Diversity, Equity, and Inclusion Statement

1042 Our study considers an isolated founder population,  
1043 not only genetically, but also culturally, as their  
1044 lifestyles deviate from modern technocratic habits,  
1045 making the Amish an under-represented population in  
1046 studies. Additionally, informed consent and community  
1047 engagement informed our sampling practices and  
1048 subsequent analyses. We also made efforts to ensure  
1049 our study cohort consisted of comparable proportions  
1050 across each sex.  
1051  
1052 Keywords: Alzheimer disease, cognitive resilience,  
1053 cognitive resistance, GWAS, linkage, isolated founder  
1054 population, pedological study



## FIGURE 1 (Leighanne Main)

1055 **Figure 1 – Amish pedigrees.** (A) 8,222 individuals  
 1056 spanning 14 generations are present in this large pedigree.  
 1057 Relationship data was drawn from the AGDB to incorporate  
 1058 ascertained individuals into existing family trees. Colored  
 1059 lines are used to connect generations between families. (B)  
 1060 Example of a 21-bit sub-pedigree generated via PedCut from  
 1061 the 14-generation pedigree to create computationally  
 1062 tractable units for analyses. An individual's sex was included  
 1063 during analyses but was removed here for privacy  
 1064 protection. Black shading indicates individuals who were CU  
 1065 at their last assessment; clear shading indicates individuals  
 1066 with CI. Grey shading indicates individuals for whom no  
 1067 information besides relationship data was available. (C)  
 1068 Larger pedigree connecting chromosome 2-linked smaller  
 1069 pedigrees. To protect privacy, sex information was included  
 1070 for analyses but was removed here. Shading indicates the  
 1071 same phenotypes as in 1B.

## FIGURE 2 (Leighanne Main)

1072 **Figure 2 – Genome-wide association study (GWAS) for**  
 1073 **cognitive preservation.** The suggestive association  
 1074 threshold ( $p=1 \times 10^{-4}$ ) is depicted with a dashed line; the  
 1075 significant association threshold ( $p=6.4 \times 10^{-7}$ ) was defined  
 1076 using the simple-M method and is depicted with a solid line.  
 1077 SNPs are represented as dots corresponding to genomic  
 1078 coordinates within their chromosome (horizontal axis). SNP  
 1079 density within each chromosome is shown as a heat map  
 1080 above each chromosome number. Chromosome 23 is the X  
 1081 chromosome. Eleven loci demonstrated suggestive  
 1082 association, located on chromosomes 1, 3, 5, 6, 7, 11, 13,  
 1083 14, 15, and 16 (and depicted as pink dots on this figure). No  
 1084 SNP surpassed the significance threshold for association.

## FIGURE 3 (Leighanne Main)

1085 **Figure 3 – Dominant two-point parametric linkage**  
 1086 **analysis for cognitive preservation.** Dominant linkage  
 1087 analysis on 21-bit pedigrees across all autosomes and the X  
 1088 chromosome, labeled as chromosome 23. Suggestive (LOD  
 1089  $\geq 1.86$ ) and significant (LOD  $\geq 3.3$ ) thresholds are denoted  
 1090 as the lower and upper dashed horizontal lines, respectively.  
 1091 A total of 72 significant results were seen across most  
 1092 chromosomes (excluding chromosomes 14, 16, 22, and 23).  
 1093 See Supplemental Figure 3 and Supplemental Tables 4 and  
 1094 4 for the complete list of all loci surpassing significant and  
 1095 suggestive thresholds.

## FIGURE 4 (Leighanne Main)

1096 **Figure 4 - Chromosome 2p11.2-13.1 linkage analysis**  
1097 **results.** Two-point dominant (green) and recessive (purple)  
1098 linkage results, two-point NPL (blue) and multipoint MCMC  
1099 (orange) (significance >3.3, upper dashed line; suggestive  
1100 >1.86, lower dashed line).

## FIGURE 5 (Leighanne Main)

1101     **Figure 5 – UCSC Genome browser for chromosome**  
1102     **2p11.2-13.1.** UCSC Genome Browser tracks of protein  
1103     coding genes in the significant linkage region on  
1104     chromosome 2 p11.2-13.1. The observed chromosomal  
1105     region is indicated by a red box on the genomic coordinate  
1106     slider. rs1402906 is located at 79Mb, highlighted by a  
1107     vertical red line across the viewer, with 5Mb on either side  
1108     shown. This region is located upstream of the genes  
1109     *CTNNA2* and *LRRTM1*.

## TABLE 1 (Leighanne Main)

1110 **Table1 – Loci meeting *ad-hoc* filtering conditions for**  
 1111 **further investigation.** Chromosome number and  
 1112 coordinates are listed for each of the top LOD scores. P-  
 1113 value is listed for suggestive GWAS result near the same  
 1114 location. For 21- and 22-bit pedigree analyses, significant ( $\geq$   
 1115 3.3) and suggestive ( $\geq 1.86$ ) HLOD scores are listed, with  
 1116 significant results in bold. Empty cells indicate that no loci  
 1117 surpassed the suggestive or significant threshold for that  
 1118 analysis.

## TABLE 2 (Leighanne Main)

1119    **Table 2 – MCMC linkage analysis for cognitive**  
1120    **preservation.** Chromosome, genomic coordinates, and LOD  
1121    score are depicted in the table. LOD scores in bold surpass



The pedigree chart illustrates a family with four generations. Affected individuals are represented by black diamonds, and unaffected individuals by grey diamonds. The pedigree shows an autosomal recessive inheritance pattern. In the first generation, two unaffected individuals have four children in the second generation. Two of these children are affected, and two are unaffected. The two affected children in the second generation have children in the third generation. One affected child has two children, one affected and one unaffected. The other affected child has one child, who is affected. The two unaffected children in the second generation have children in the third generation. One unaffected child has two children, one affected and one unaffected. The other unaffected child has two children, one affected and one unaffected. The two affected children in the third generation have children in the fourth generation. One affected child has one child, who is affected. The other affected child has one child, who is affected. The two unaffected children in the third generation have children in the fourth generation. One unaffected child has one child, who is affected. The other unaffected child has one child, who is affected.



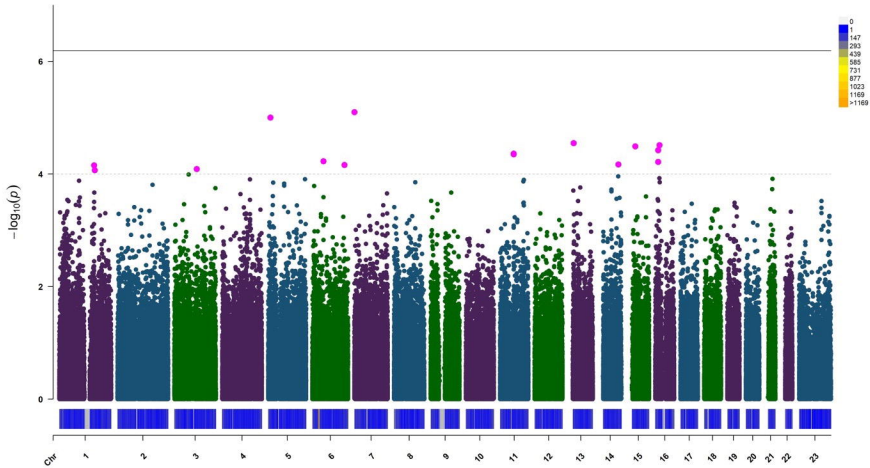

# Dominant Parametric Linkage Analysis for Cognitive Preservation

HLOD Score

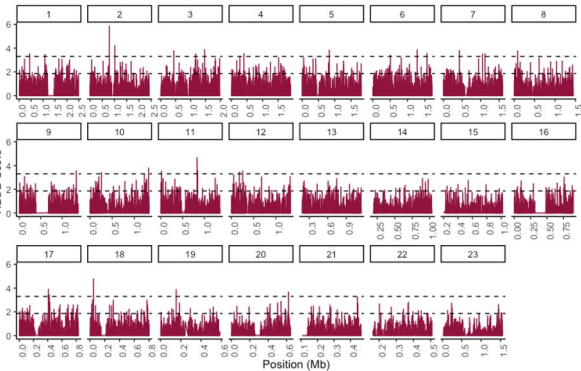

# Chromosome 2 p11.2-13.1 Linkage Analysis Results

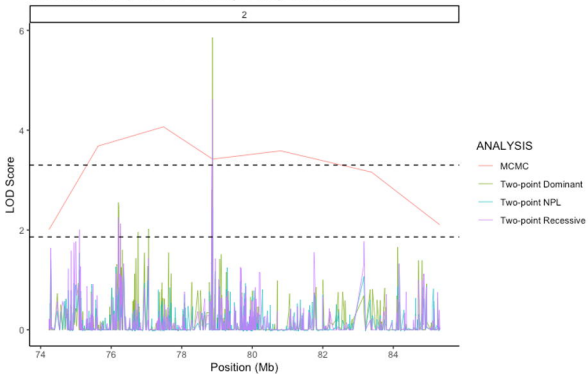

chr2 (p13.1-p11.2)

21

p12

3435

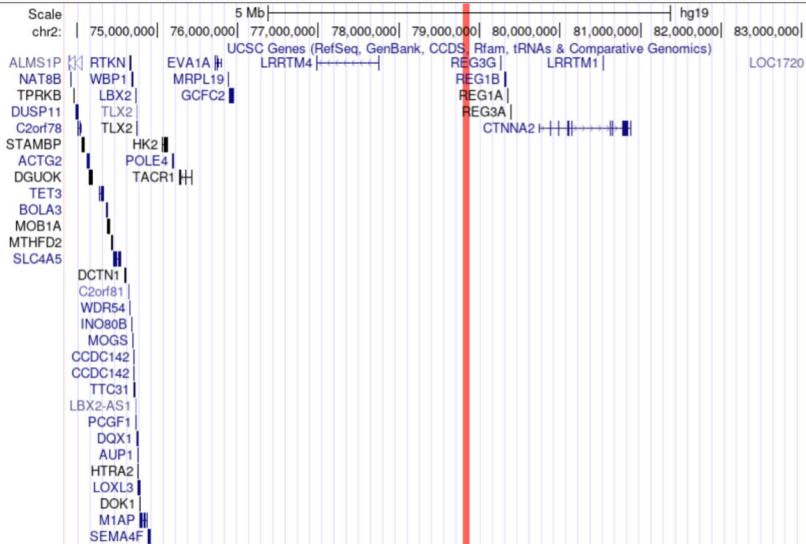

| Chr | Location    | GWAS     | 21-bit pedigrees |                    |                     |                     | 22-bit pedigrees |                    |                     |                     |
|-----|-------------|----------|------------------|--------------------|---------------------|---------------------|------------------|--------------------|---------------------|---------------------|
|     |             | p-value  | Two-point NPL    | Two-point Dominant | Two-point Recessive | Multipoint Dominant | Two-point NPL    | Two-point Dominant | Two-point Recessive | Multipoint Dominant |
| 1   | 165,478,920 | 7.00E-05 | 1.9              |                    | 3.4                 |                     |                  |                    | 3.2                 |                     |
| 2   | 78,873,098  |          | 2.4              | 5.9                | 4.6                 |                     | 1.9              | 4.9                | 3                   |                     |
| 3   | 108,251,237 | 8.20E-05 |                  | 3.3                |                     |                     | 2                | 3.6                |                     |                     |
| 7   | 139,996,449 |          | 2.1              | 2.4                | 4.1                 |                     |                  |                    | 3.8                 |                     |
| 11  | 83,081,483  |          | 2                | 4.7                | 2.9                 |                     |                  |                    | 3.3                 |                     |
| 17  | 4,487,906   |          |                  | 2.3                |                     | 2.3                 |                  | 4.1                |                     | 4.1                 |

| Chromosome | Location (bp) GRCh38      | Top LOD Score |
|------------|---------------------------|---------------|
| 1          | 159,476,580 – 167,672,055 | 1.97          |
| 2          | 72,972,490 – 80,875,139   | <b>4.14</b>   |
| 7          | 138,047,463 – 141,972,804 | 0.6           |
| 11         | 81,074,649 – 85,224,030   | 2.64          |
| 17         | 3,492,832 – 5,478,547     | 0.13          |
